# Supplementary material for: Analysis on The Risk of Respiratory Virus Transmission By Air Conditioning System Operation-Based on Experimental Evidence
Source: Research Square preprint supplement (doi:10.21203/rs.3.rs-192895/v1), 2021-02-15
Supplement: Supplementary file 1 [file f2200058cbcaa04bde91361c.docx]

**Appendix 2**

Summary Table of the Series of Papers

| No. | Authors | Title | References | state |
| --- | --- | --- | --- | --- |
| 1 | N Mao, C K An, L Y Guo, M Wang, L Guo, S R Guo and E S Long | Transmission risk of infectious droplets in physical spreading process at different times：A Review | 74 | Accepted by Building and Environment，at Sept.17,2020 |
| 2 | H R Li, Y Li, Y X Huang, L L Chen, and E S Long* | Review of animal models of virus transmission: Implications for the risk of transmission of SARS-CoV-2 in different routes | 56 | Submission or review |
| 3 | L Guo, Z Yang, L L Chen, and E S Long* | Effects of Temperature and Relative Humidity on Virus Survival and Infectivity: Implications for the Epidemiology of COVID-19 | 57 | Submission or review |
| 4 | T P Bai, S Q Wang, W T Jiang, L L Chen, L Guo, Z Yang, E S Long* | The peak of COVID-19 transmission may be related to climatic factors | 51 | Submission or review |
| 5 | L Y Guo, M Wang, L Zhang, N Mao, C K An, L T Xu, E S Long* | Transmission risk of viruses in large mucosalivary droplets on the surface of objects: A time based analysis | 45 | Accepted by Médecine et Maladies Infectieuses，at Nov.5,2020 |
| 6 | J C Wei，S R Guo，E S Long*，L Zhang，B Z Shu, L Guo，L Y Guo | Why does the spread of COVID-19 vary greatly in different countries? Revealing the efficacy of face masks in epidemic prevention | 64 | Accepted by Epidemiology and Infection，at Jan.11, 2021 |
| 7 | S R Guo, J Li, B Z Shu, L L Chen, L Y Guo, and E S Long* | Methods for assessing the transmission risk of respiratory diseases in confined spaces: a review | 74 | Submission or review |
| 8 | Y Xiang, Y H Jia, L L Chen, and E S Long* | COVID-19 epidemic prediction and the impact of public health interventions: a review of COVID-19 epidemic models | 70 | Accepted by Infectious Disease Modelling，at Jan.2, 2021 |
| 9 | L Y Guo, Z Yang, L Guo, L L Chen, Z Chen, E S Long* | Study on the decay law of respiratory viruses on the surface of objects | 46 | Accepted by Environmental Research，at Jan.4, 2021 |
| 10 | J Li, S R Guo, Y H Jia, Z Chen, Z Yang, E S Long* | Evaluation of Infection Risk for SARS-CoV-2 Transmission on University Campus | 88 | Ready for submission |
| 11 | Z Yang, L Y Guo, L Guo, Z Chen, E S Long* | Study on the decay characteristics and transmission risk of respiratory viruses in the air | 62 | Ready for submission |
| 12 | Y H Jia, L Y Guo, Z Chen,Y Zhang, E S Long* | Analysis of transmission risk of respiratory viruses from air conditioning system operation - based on medical experimental evidence | 83 | Ready for submission |
| 13 | C K An, N Mao, Y Zhang, Z Chen, G Z Ban, E S Long* | Model prediction of the influence of temperature and humidity on the salivary evaporation process and medical experimental evidence for its association with virus decay | 49 | Ready for submission |
| 14 | Q Dong, Y H Jia, Y Zhang, Z Chen, E S Long* | Comprehensive effect evaluation of the operation of room filters for non-centralized air conditioning during the epidemic period | 52 | Ready for submission |
| 15 | N Mao, L Y Guo, L Guo, L Zhang and E S Long* | Transmission model of Respiratory viruses and transmission risk prediction of typical scenarios based on the consideration of temperature, humidity and air saturation state | 65 | Ready for submission |
